# Supplementary material
Source: PubMed Central journal article supplement (PMC3999171)
Supplement: NIHMS552485-supplement-supplement_1.pdf [file NIHMS552485-supplement-supplement_1.pdf]

**Supplementary Table 1.** Summary scores of Th1/Th17 immunohistochemistry in PBC.

| Sex | Age | Scheuer's<br>Stage | PT# <sup>1</sup> | Avg. Th1<br>Score | Avg. Th17<br>Score | Th1/Th17 | Log <sub>2</sub> (Th1/Th17) |
|-----|-----|--------------------|------------------|-------------------|--------------------|----------|-----------------------------|
| F   | 43  | 1                  | 2                | <b>7.0</b>        | <b>6.8</b>         | 1.0      | 0.05                        |
| M   | 62  | 1                  | 2                | <b>8.0</b>        | <b>8.0</b>         | 1.0      | 0.00                        |
| F   | 61  | 1                  | 3                | <b>6.5</b>        | <b>6.8</b>         | 1.0      | -0.05                       |
| F   | 67  | 1                  | 6                | <b>8.5</b>        | <b>8.2</b>         | 1.0      | 0.06                        |
| F   | 46  | 1                  | 5                | <b>7.8</b>        | <b>7.0</b>         | 1.1      | 0.16                        |
| F   | 56  | 2                  | 6                | <b>9.8</b>        | <b>9.8</b>         | 1.0      | 0.00                        |
| F   | 52  | 1                  | 5                | <b>7.6</b>        | <b>8.0</b>         | 1.0      | -0.07                       |
| F   | 59  | 1                  | 4                | <b>7.0</b>        | <b>9.5</b>         | 0.7      | -0.44                       |
| M   | 54  | 2                  | 7                | <b>5.2</b>        | <b>4.3</b>         | 1.2      | 0.28                        |
| M   | 59  | 3                  | 8                | <b>8.5</b>        | <b>9.0</b>         | 0.9      | -0.08                       |
| M   | 68  | 3                  | 6                | <b>6.7</b>        | <b>7.8</b>         | 0.9      | -0.23                       |
| M   | 55  | 2                  | 5                | <b>7.2</b>        | <b>7.8</b>         | 0.9      | -0.12                       |
| F   | 79  | 1                  | 4                | <b>7.0</b>        | <b>7.5</b>         | 0.9      | -0.10                       |
| F   | 53  | 3                  | 5                | <b>8.4</b>        | <b>7.2</b>         | 1.2      | 0.22                        |
| F   | 54  | 1                  | 3                | <b>7.7</b>        | <b>6.3</b>         | 1.2      | 0.28                        |
| F   | 67  | 1                  | 5                | <b>8.8</b>        | <b>8.2</b>         | 1.1      | 0.10                        |
| F   | 66  | 3                  | 5                | <b>8.6</b>        | <b>9.0</b>         | 1.0      | -0.07                       |
| F   | 49  | 3                  | 6                | <b>8.8</b>        | <b>7.5</b>         | 1.2      | 0.24                        |
| F   | 57  | 3                  | 3                | <b>8.5</b>        | <b>10.2</b>        | 0.8      | -0.26                       |
| F   | 51  | 1                  | 5                | <b>9.0</b>        | <b>8.6</b>         | 1.0      | 0.07                        |
| M   | 63  | 3                  | 6                | <b>7.8</b>        | <b>7.8</b>         | 1.0      | -0.02                       |
| M   | 60  | 1                  | 6                | <b>9.6</b>        | <b>8.0</b>         | 1.2      | 0.26                        |
| F   | 56  | 4                  | 4                | <b>6.1</b>        | <b>6.0</b>         | 1.0      | 0.03                        |
| F   | 54  | 2                  | 4                | <b>5.9</b>        | <b>5.0</b>         | 1.2      | 0.23                        |

|   |    |   |    |            |            |     |       |
|---|----|---|----|------------|------------|-----|-------|
| F | 49 | 4 | 4  | <b>2.8</b> | <b>6.0</b> | 0.5 | -1.13 |
| F | 52 | 1 | 6  | <b>4.8</b> | <b>4.8</b> | 1.0 | 0.00  |
| F | 50 | 3 | 3  | <b>8.3</b> | <b>8.0</b> | 1.0 | 0.06  |
| M | 40 | 3 | 4  | <b>4.0</b> | <b>7.3</b> | 0.6 | -0.86 |
| F | 55 | 4 | 5  | <b>5.7</b> | <b>6.5</b> | 0.9 | -0.19 |
| F | 50 | 2 | 11 | <b>5.6</b> | <b>6.6</b> | 0.8 | -0.25 |
| M | 63 | 3 | 8  | <b>4.3</b> | <b>8.8</b> | 0.5 | -1.02 |
| M | 61 | 4 | 7  | <b>7.1</b> | <b>4.1</b> | 1.8 | 0.81  |
| F | 34 | 1 | 1  | 4.5        | 3.5        | 1.3 | 0.36  |
| F | 60 | 3 | 7  | <b>8.9</b> | <b>8.7</b> | 1.0 | 0.02  |
| F | 43 | 3 | 9  | <b>5.9</b> | <b>6.6</b> | 0.9 | -0.14 |
| F | 57 | 4 | 7  | <b>7.1</b> | <b>6.2</b> | 1.1 | 0.20  |
| F | 66 | 4 | 6  | <b>7.8</b> | <b>9.3</b> | 0.8 | -0.27 |
| F | 66 | 4 | 5  | <b>6.1</b> | <b>7.3</b> | 0.8 | -0.26 |
| F | 43 | 2 | 2  | <b>3.0</b> | <b>3.5</b> | 0.9 | -0.22 |
| F | 48 | 4 | 4  | <b>6.0</b> | <b>6.6</b> | 0.9 | -0.14 |
| F | 31 | 3 | 3  | <b>6.8</b> | <b>8.3</b> | 0.8 | -0.29 |
| F | 52 | 4 | 11 | <b>6.7</b> | <b>8.7</b> | 0.8 | -0.39 |
| F | 60 | 3 | 7  | <b>9.9</b> | <b>9.7</b> | 1.0 | 0.03  |
| F | 62 | 3 | 3  | <b>4.3</b> | <b>8.2</b> | 0.5 | -0.91 |
| F | 30 | 3 | 3  | <b>4.3</b> | <b>5.7</b> | 0.8 | -0.39 |
| F | 47 | 4 | 6  | <b>3.9</b> | <b>7.8</b> | 0.5 | -1.00 |
| F | 65 | 4 | 3  | <b>8.3</b> | <b>5.3</b> | 1.6 | 0.64  |
| F | 50 | 3 | 3  | <b>4.5</b> | <b>7.0</b> | 0.6 | -0.64 |
| M | 31 | 1 | 5  | <b>3.8</b> | <b>4.6</b> | 0.8 | -0.28 |
| M | 22 | 3 | 4  | <b>4.5</b> | <b>7.8</b> | 0.6 | -0.78 |
| F | 58 | 2 | 3  | <b>4.2</b> | <b>8.7</b> | 0.5 | -1.06 |

---

<sup>1</sup> Number of portal tracts evaluated in each subject

**Supplementary Table 2.** Summary scores of Th1/Th17 immunohistochemistry in AIH.

| Sex | Age | Stage | PT# <sup>1</sup> | Avg. Th1<br>Score | Avg. Th17<br>Score | Th1/Th17 | Log <sub>2</sub> (Th1/Th17) |
|-----|-----|-------|------------------|-------------------|--------------------|----------|-----------------------------|
| F   | 61  | 3     | 9                | <b>5.4</b>        | <b>3.4</b>         | 1.6      | 0.65                        |
| F   | 47  | 3     | 4                | <b>7.9</b>        | <b>4.8</b>         | 1.7      | 0.73                        |
| F   | 26  | 3     | 6                | <b>4.3</b>        | <b>5.3</b>         | 0.8      | -0.33                       |
| F   | 55  | 2     | 3                | <b>3.5</b>        | <b>5.5</b>         | 0.6      | -0.65                       |
| F   | 58  | 1     | 9                | <b>8.1</b>        | <b>6.1</b>         | 1.3      | 0.41                        |
| F   | 65  | 4     | 5                | <b>7.6</b>        | <b>4.1</b>         | 1.9      | 0.89                        |
| F   | 53  | 3     | 4                | <b>6.0</b>        | <b>8.0</b>         | 0.8      | -0.42                       |
| M   | 62  | 3     | 2                | <b>4.5</b>        | <b>6.0</b>         | 0.8      | -0.42                       |
| F   | 59  | 4     | 6                | <b>7.5</b>        | <b>5.8</b>         | 1.3      | 0.38                        |
| F   | 56  | 3     | 4                | <b>8.3</b>        | <b>3.6</b>         | 2.3      | 1.19                        |
| F   | 43  | 2     | 6                | <b>7.1</b>        | <b>3.8</b>         | 1.8      | 0.89                        |
| F   | 28  | 2     | 6                | <b>7.5</b>        | <b>4.0</b>         | 1.9      | 0.91                        |
| F   | 49  | 1     | 3                | <b>1.7</b>        | <b>3.8</b>         | 0.4      | -1.20                       |
| F   | 50  | 4     | 5                | <b>7.7</b>        | <b>4.3</b>         | 1.8      | 0.84                        |
| F   | 54  | 1     | 3                | <b>3.8</b>        | <b>5.7</b>         | 0.7      | -0.56                       |
| F   | 60  | 2     | 2                | <b>3.0</b>        | <b>7.0</b>         | 0.4      | -1.22                       |
| F   | 48  | 3     | 1                | <b>2.5</b>        | <b>5.5</b>         | 0.5      | -1.14                       |
| F   | 50  | 2     | 5                | <b>4.5</b>        | <b>7.1</b>         | 0.6      | -0.66                       |
| M   | 38  | 2     | 3                | <b>8.8</b>        | <b>4.0</b>         | 2.2      | 1.14                        |
| M   | 27  | 0     | 5                | <b>2.0</b>        | <b>3.9</b>         | 0.5      | -0.96                       |
| F   | 54  | 3     | 3                | <b>7.2</b>        | <b>6.0</b>         | 1.2      | 0.26                        |
| F   | 39  | 0     | 8                | <b>8.9</b>        | <b>9.9</b>         | 0.9      | -0.16                       |
| F   | 56  | 4     | 5                | <b>4.4</b>        | <b>3.9</b>         | 1.1      | 0.17                        |
| F   | 55  | 3     | 4                | <b>8.0</b>        | <b>7.8</b>         | 1.0      | 0.05                        |

|   |    |   |   |            |            |     |       |
|---|----|---|---|------------|------------|-----|-------|
| F | 55 | 3 | 4 | <b>3.6</b> | <b>7.0</b> | 0.5 | -0.95 |
| F | 11 | 0 | 3 | <b>8.2</b> | <b>4.3</b> | 1.9 | 0.91  |
| F | 40 | 1 | 2 | <b>2.8</b> | <b>3.8</b> | 0.7 | -0.45 |
| F | 62 | 3 | 2 | <b>7.3</b> | <b>4.0</b> | 1.8 | 0.86  |
| M | 17 | 3 | 9 | <b>6.8</b> | <b>5.1</b> | 1.3 | 0.41  |
| F | 64 | 2 | 3 | <b>7.0</b> | <b>8.5</b> | 0.8 | -0.28 |
| F | 23 | 1 | 2 | <b>7.8</b> | <b>6.3</b> | 1.2 | 0.31  |
| F | 54 | 2 | 4 | <b>9.9</b> | <b>5.9</b> | 1.7 | 0.75  |
| M | 37 | 3 | 3 | <b>2.5</b> | <b>7.3</b> | 0.3 | -1.55 |
| F | 35 | 2 | 4 | <b>7.9</b> | <b>8.8</b> | 0.9 | -0.15 |
| F | 56 | 2 | 2 | <b>5.5</b> | <b>6.0</b> | 0.9 | -0.13 |
| F | 50 | 3 | 2 | <b>4.8</b> | <b>5.0</b> | 1.0 | -0.07 |
| F | 45 | 1 | 2 | <b>6.0</b> | <b>6.3</b> | 1.0 | -0.06 |
| F | 48 | 0 | 1 | <b>5.5</b> | <b>5.0</b> | 1.1 | 0.14  |
| F | 52 | 4 | 3 | <b>4.3</b> | <b>7.8</b> | 0.6 | -0.85 |
| M | 30 | 0 | 4 | <b>3.6</b> | <b>2.5</b> | 1.5 | 0.54  |
| M | 45 | 3 | 6 | <b>3.1</b> | <b>8.1</b> | 0.4 | -1.39 |

---

<sup>1</sup> Number of portal tracts evaluated in each subject

**Supplementary Table 3.** Summary scores of Th1/Th17 immunohistochemistry in HBV.

| <b>Sex</b> | <b>Age</b> | <b>Stage</b> | <b>PT#<sup>1</sup></b> | <b>Avg. Th1<br/>Score</b> | <b>Avg. Th17<br/>Score</b> | <b>Th1/Th17</b> | <b>Log<sub>2</sub> (Th1/Th17)</b> |
|------------|------------|--------------|------------------------|---------------------------|----------------------------|-----------------|-----------------------------------|
| M          | 49         | 4            | 7                      | 3.7                       | 2.4                        | 1.6             | 0.66                              |
| F          | 48         | 4            | 7                      | 6.4                       | 3.0                        | 2.1             | 1.10                              |
| M          | 39         | 4            | 4                      | 7.5                       | 5.3                        | 1.4             | 0.51                              |
| M          | 62         | 3            | 4                      | 7.9                       | 4.0                        | 2.0             | 0.98                              |
| M          | 48         | 1            | 1                      | 5.5                       | 5.5                        | 1.0             | 0.00                              |
| F          | 27         | 1            | 5                      | 4.8                       | 3.3                        | 1.5             | 0.54                              |
| F          | 45         | 1            | 8                      | 2.9                       | 4.5                        | 0.7             | -0.62                             |
| M          | 37         | 4            | 5                      | 2.7                       | 4.4                        | 0.6             | -0.70                             |
| M          | 52         | 4            | 4                      | 5.0                       | 6.3                        | 0.8             | -0.32                             |
| M          | 22         | 0            | 2                      | 4.3                       | 3.0                        | 1.4             | 0.50                              |
| M          | 36         | 4            | 4                      | 4.4                       | 5.4                        | 0.8             | -0.30                             |
| M          | 39         | 3            | 5                      | 3.4                       | 3.9                        | 0.9             | -0.20                             |
| M          | 40         | 3            | 8                      | 4.4                       | 5.4                        | 0.8             | -0.28                             |
| F          | 65         | 3            | 4                      | 3.9                       | 3.1                        | 1.2             | 0.31                              |
| M          | 39         | 3            | 8                      | 7.6                       | 6.6                        | 1.2             | 0.20                              |
| M          | 41         | 3            | 5                      | 5.6                       | 3.3                        | 1.7             | 0.76                              |
| M          | 50         | 0            | 6                      | 3.8                       | 6.3                        | 0.6             | -0.71                             |
| M          | 54         | 0            | 1                      | 7.5                       | 2.5                        | 3.0             | 1.58                              |
| F          | 37         | 4            | 2                      | 3.8                       | 3.5                        | 1.1             | 0.10                              |
| M          | 35         | 1            | 2                      | 4.8                       | 5.3                        | 0.9             | -0.14                             |
| F          | 55         | 1            | 1                      | 5.0                       | 4.0                        | 1.3             | 0.32                              |
| M          | 41         | 2            | 3                      | 7.0                       | 4.0                        | 1.8             | 0.81                              |
| F          | 35         | 0            | 4                      | 3.3                       | 5.8                        | 0.6             | -0.82                             |
| M          | 50         | 1            | 2                      | 7.5                       | 4.0                        | 1.9             | 0.91                              |

|   |    |   |   |            |            |     |      |
|---|----|---|---|------------|------------|-----|------|
| F | 32 | 0 | 1 | <b>4.5</b> | <b>4.0</b> | 1.1 | 0.17 |
| M | 39 | 4 | 5 | <b>3.5</b> | <b>0.8</b> | 4.4 | 2.13 |

---

<sup>1</sup> Number of portal tracts evaluated in each subject

**Supplementary Table 4.** Summary scores of Th1/Th17 immunohistochemistry in HCV.

| <b>Sex</b> | <b>Age</b> | <b>Stage</b> | <b>PT#<sup>1</sup></b> | <b>Avg. Th1<br/>Score</b> | <b>Avg. Th17<br/>Score</b> | <b>Th1/Th17</b> | <b>Log<sub>2</sub> (Th1/Th17)</b> |
|------------|------------|--------------|------------------------|---------------------------|----------------------------|-----------------|-----------------------------------|
| M          | 43         | 1            | 8                      | <b>5.4</b>                | <b>8.5</b>                 | 0.6             | -0.66                             |
| F          | 53         | 1            | 4                      | <b>4.5</b>                | <b>9.3</b>                 | 0.5             | -1.04                             |
| F          | 67         | 2            | 12                     | <b>4.2</b>                | <b>5.1</b>                 | 0.8             | -0.28                             |
| F          | 56         | 2            | 8                      | <b>5.9</b>                | <b>7.6</b>                 | 0.8             | -0.36                             |
| F          | 60         | 1            | 9                      | <b>8.2</b>                | <b>8.6</b>                 | 1.0             | -0.06                             |
| F          | 68         | 2            | 7                      | <b>5.9</b>                | <b>10.1</b>                | 0.6             | -0.79                             |
| F          | 72         | 2            | 3                      | <b>6.1</b>                | <b>10.5</b>                | 0.6             | -0.78                             |
| F          | 58         | 1            | 4                      | <b>6.5</b>                | <b>9.8</b>                 | 0.7             | -0.58                             |
| M          | 72         | 1            | 4                      | <b>7.8</b>                | <b>10.3</b>                | 0.8             | -0.40                             |
| F          | 45         | 1            | 3                      | <b>7.0</b>                | <b>11.3</b>                | 0.6             | -0.70                             |
| F          | 76         | 3            | 3                      | <b>7.7</b>                | <b>11.7</b>                | 0.7             | -0.61                             |
| F          | 68         | 1            | 4                      | <b>4.3</b>                | <b>7.5</b>                 | 0.6             | -0.82                             |
| F          | 68         | 2            | 5                      | <b>7.8</b>                | <b>10.6</b>                | 0.7             | -0.44                             |

<sup>1</sup> Number of portal tracts evaluated in each subject
